# Supplementary material for: Taxonomic evaluation of selected Ganoderma species and database sequence validation
Source: PeerJ journal article supplement (doi:10.7717/peerj.3596), 2017-07-27
Supplement: Fig_S1_(Correction_with_legend).pdf [file Fig_S1_%28Correction_with_legend%29.pdf]

Fig. S1 Geographic distribution of four *Ganoderma* species based on the validated sequence database generated by this study. Blue circles represent location of specimen collection from published papers. Gray circles represent location of direct GenBank submission. SFC sequences were not included in the map.

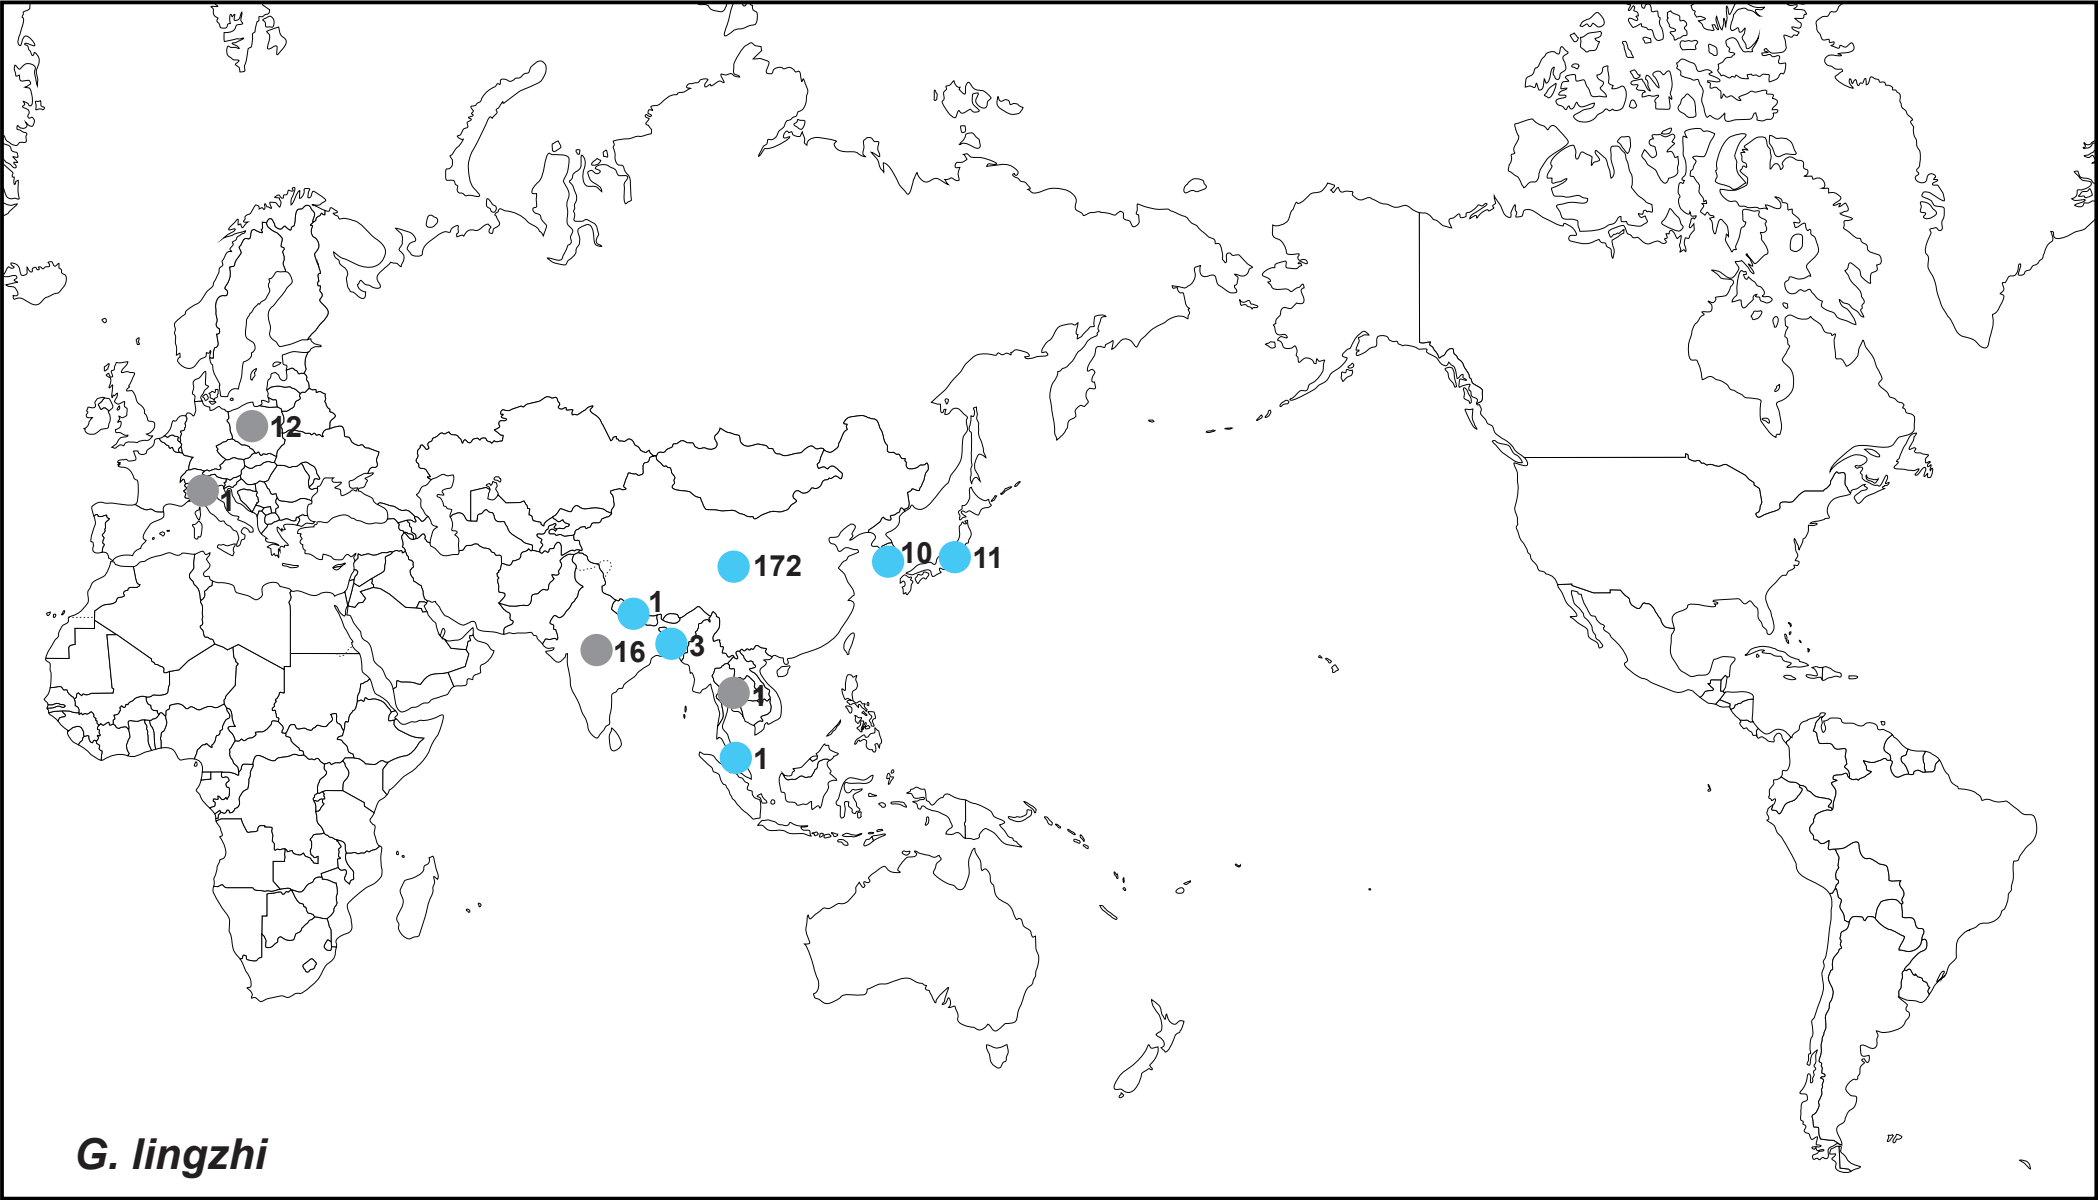

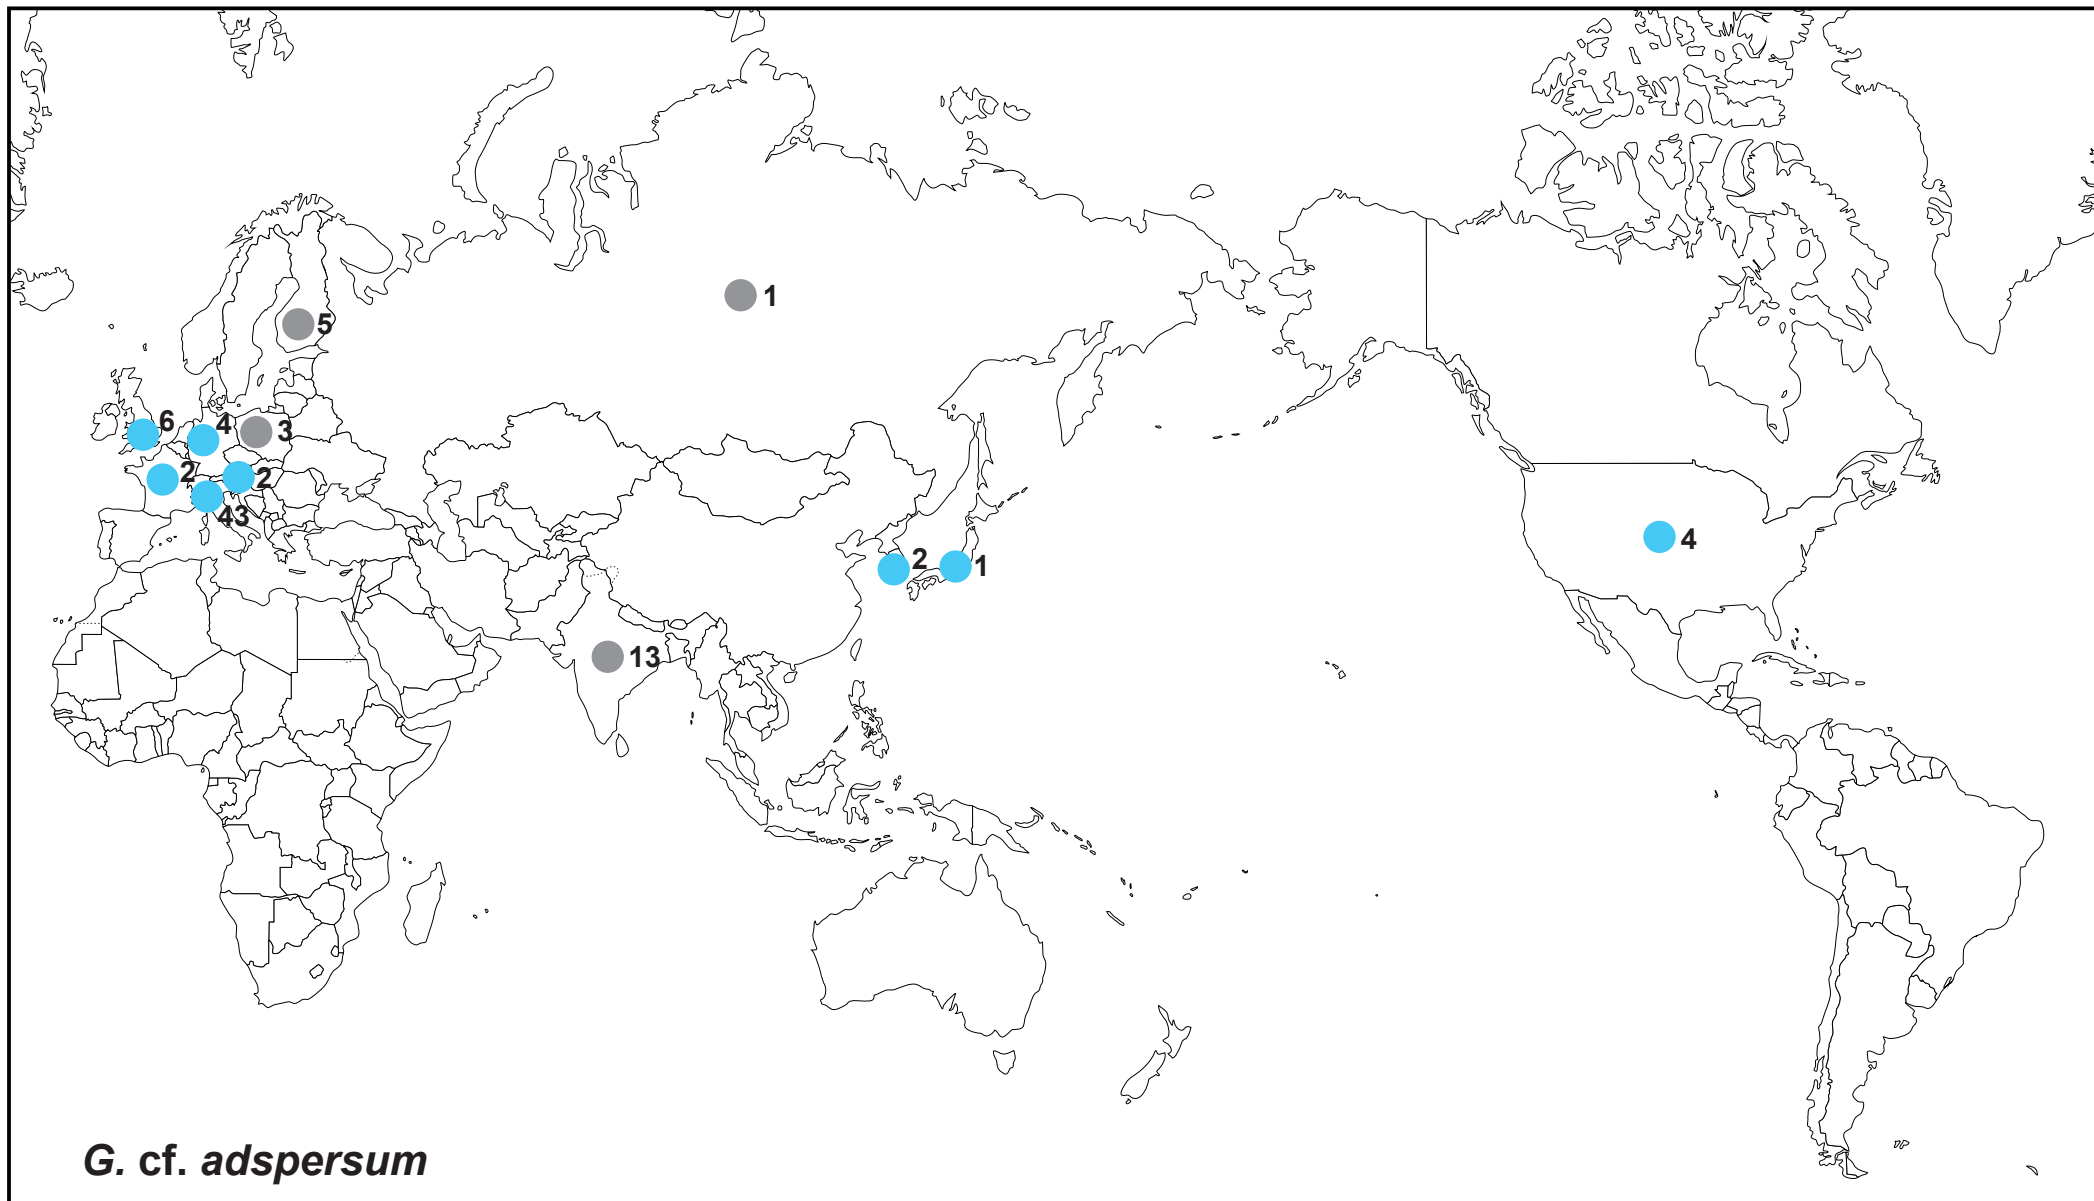

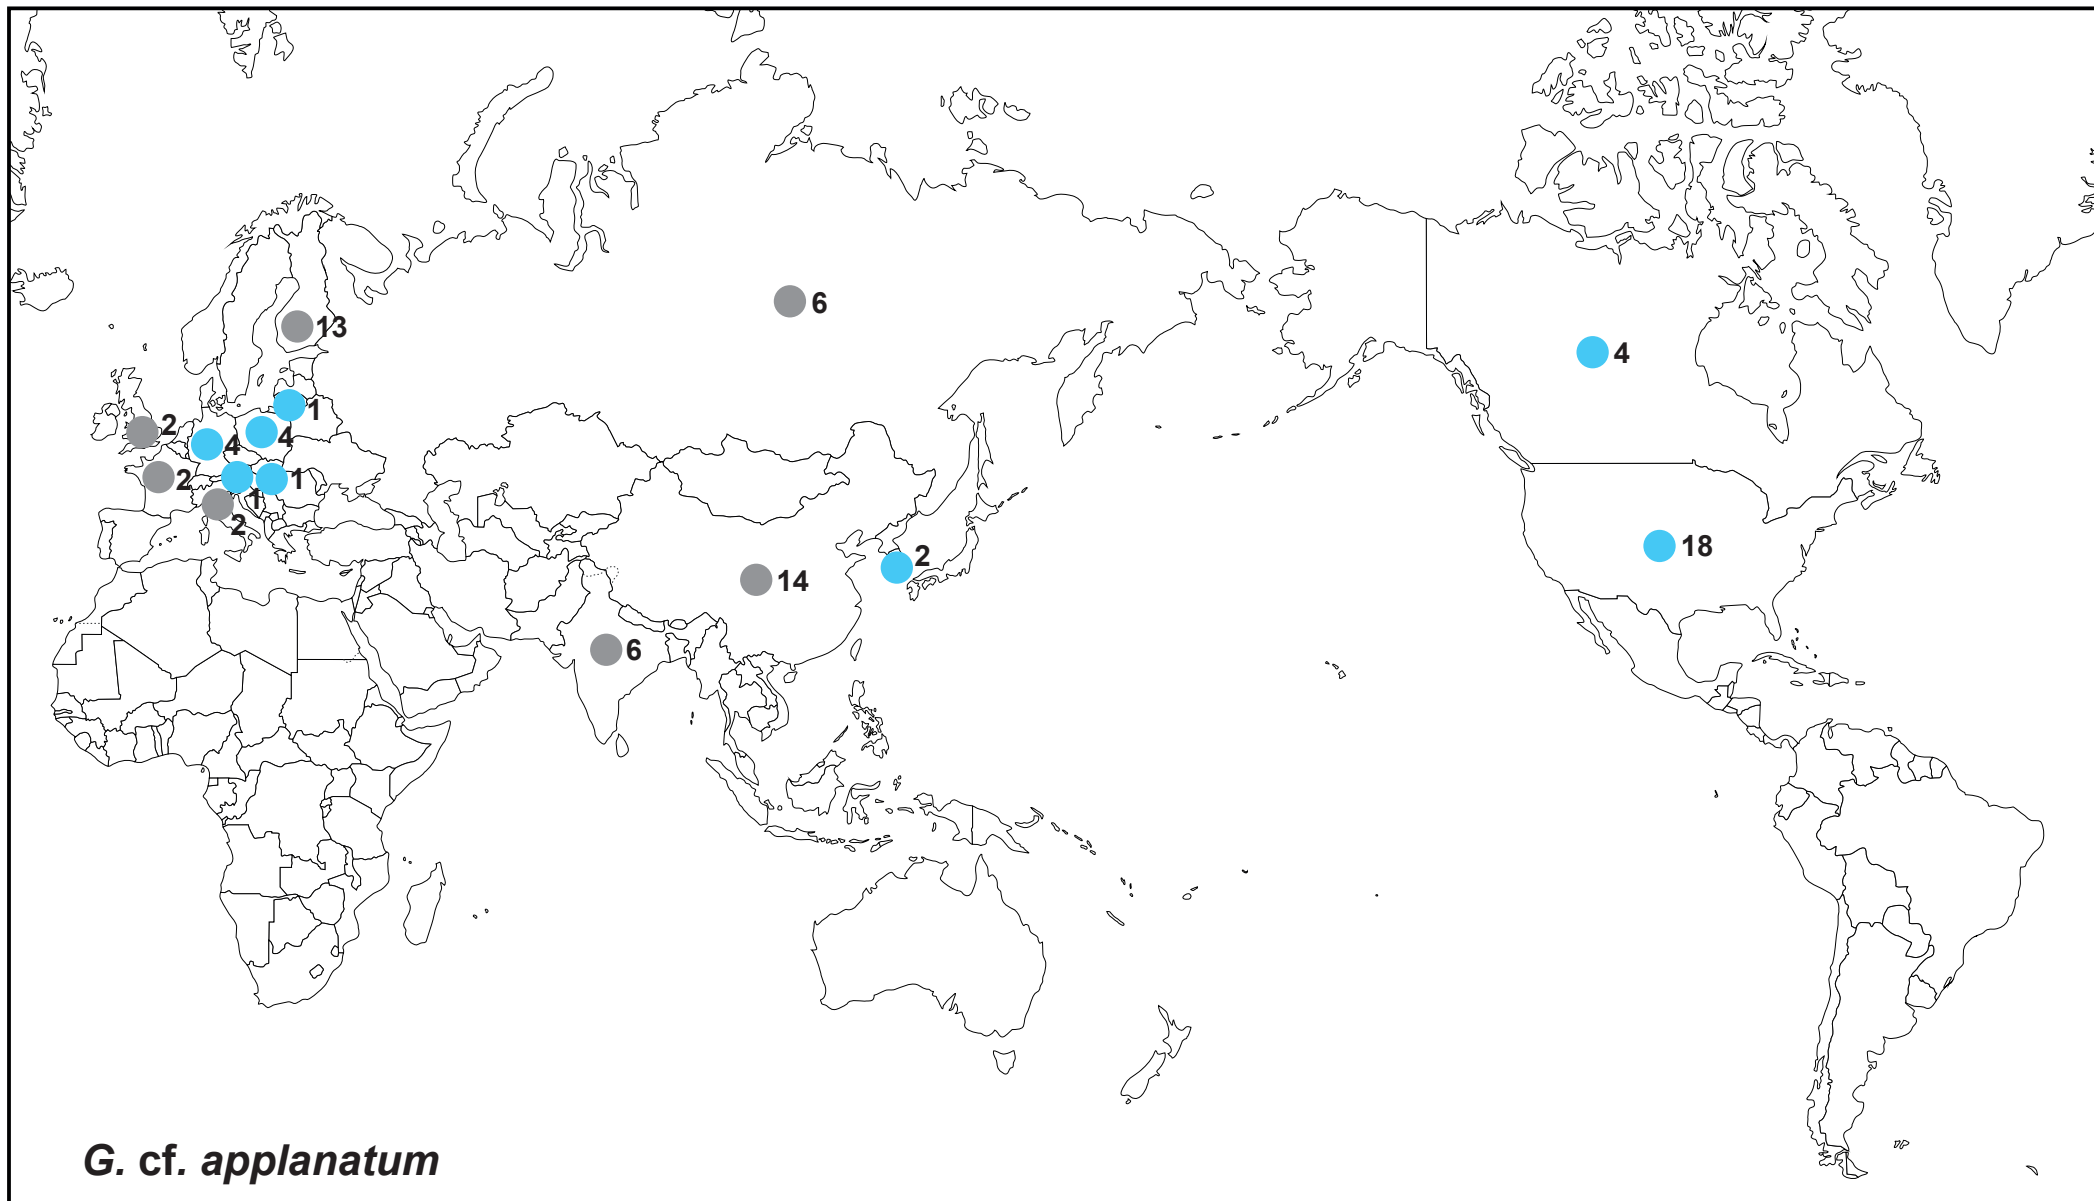

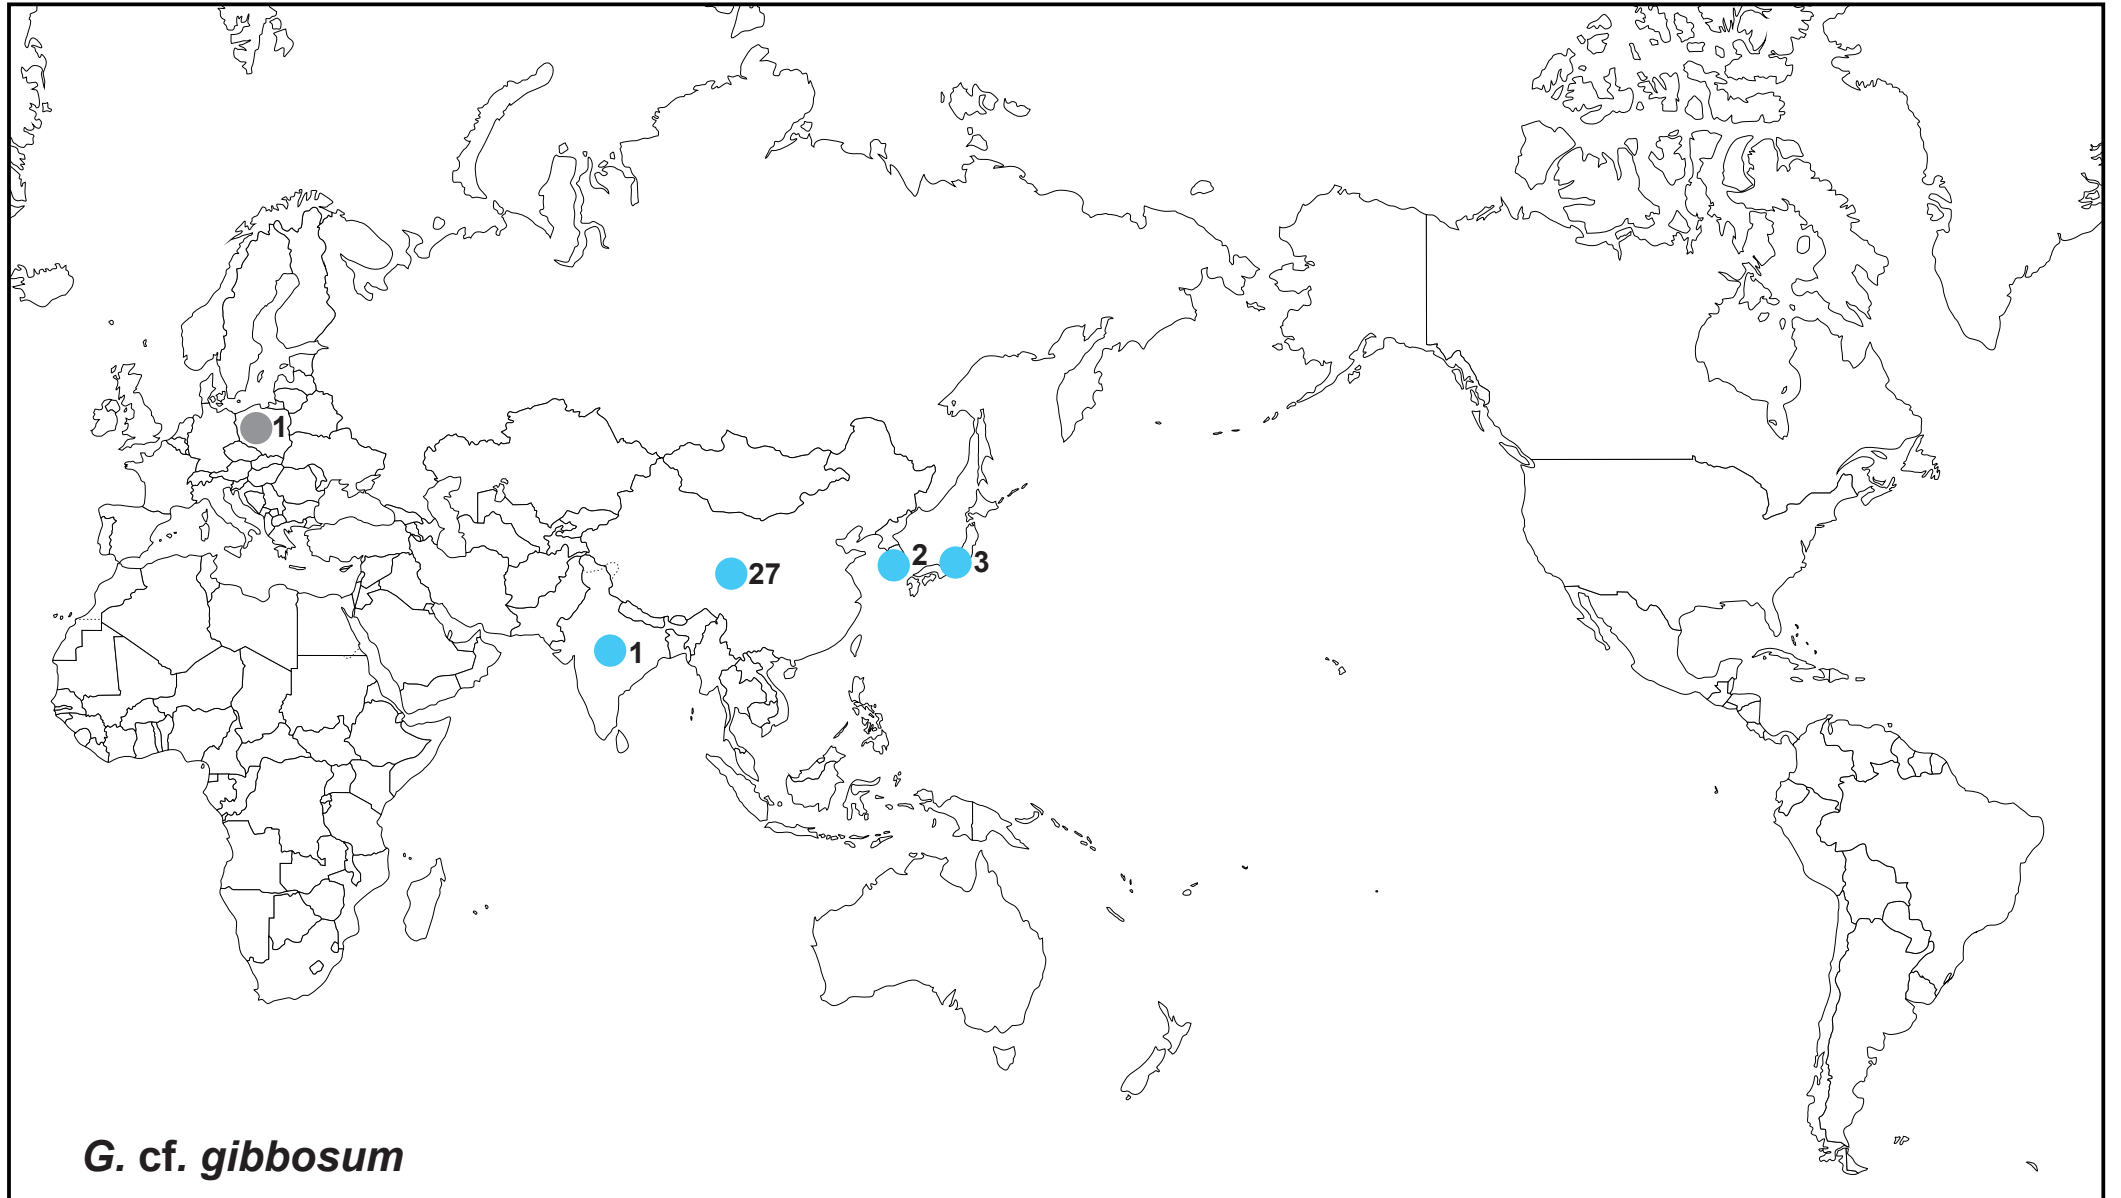

***G. cf. gibbosum***
