# Supplementary material for: Taxonomic evaluation of selected Ganoderma species and database sequence validation
Source: PubMed Central journal article supplement (PMC5534161; doi:10.7717/peerj.3596), 2017-07-27

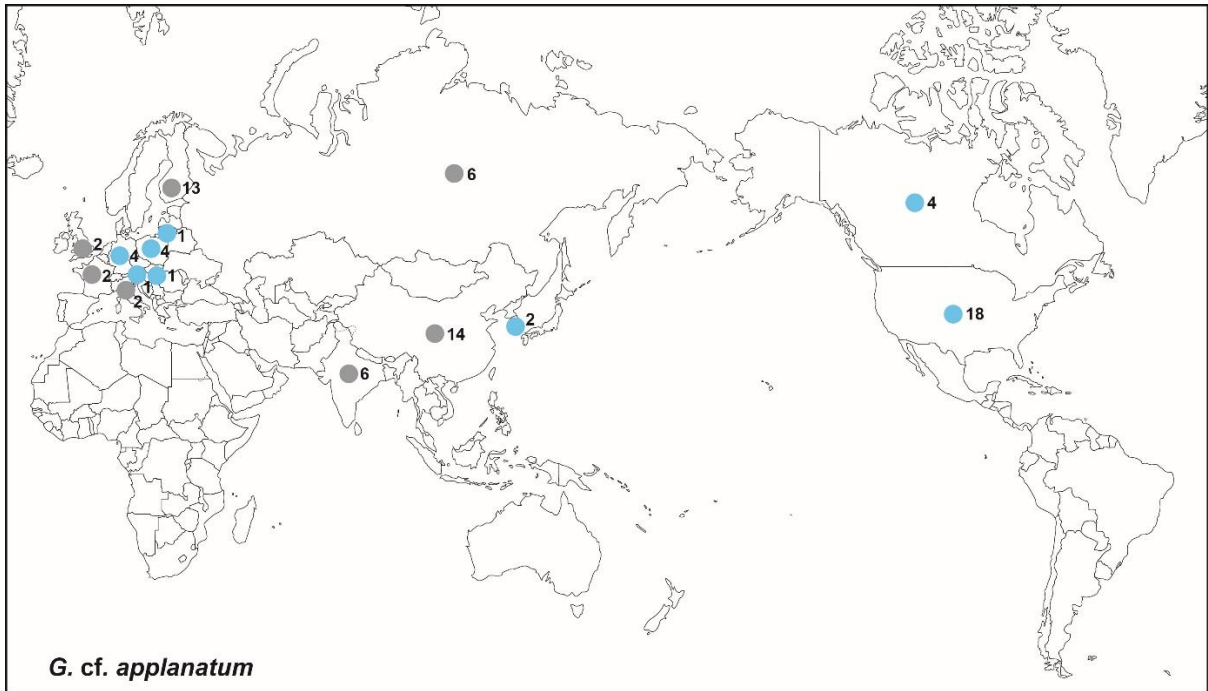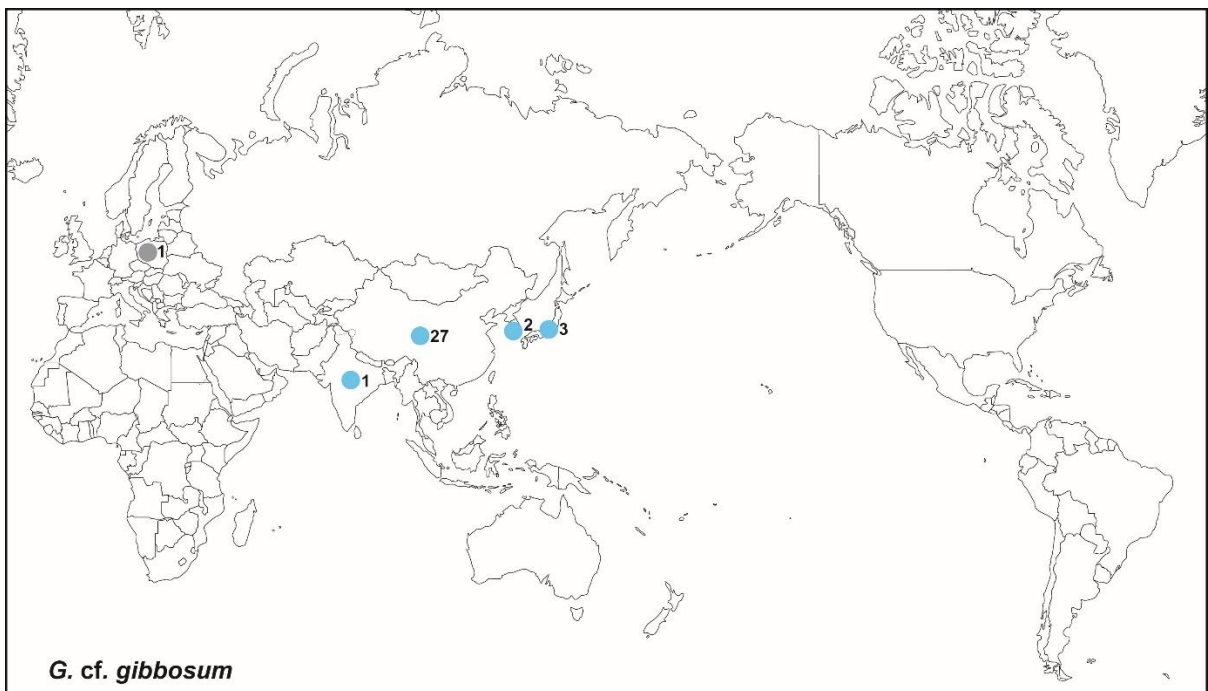

Supplement: peerj-05-3596-s001.pdf [file peerj-05-3596-s001.pdf]
